# Supplementary material for: Evidence of disrupted high-risk human papillomavirus DNA in morphologically normal cervices of older women
Source: PubMed Central journal article supplement (PMC4753489; doi:10.1038/srep20847), 2016-02-15
Supplement: srep20847-s1.pdf [file srep20847-s1.pdf]

# **Evidence of disrupted high-risk human papillomavirus DNA in morphologically normal cervixes of older women**

**Running title:** Disrupted HPV DNA in normal cervixes

**Authors:** Sarah M. Leonard<sup>1\*</sup>, Merlin Pereira<sup>1\*</sup>, Sally Roberts<sup>1</sup>, Kate Cuschieri<sup>2</sup>, Gerard Nuovo<sup>3</sup>, Ramanand Athavale<sup>4</sup>, Lawrence Young<sup>5</sup>, Raji Ganesan<sup>6</sup>, Ciarán B. Woodman<sup>1</sup>

A

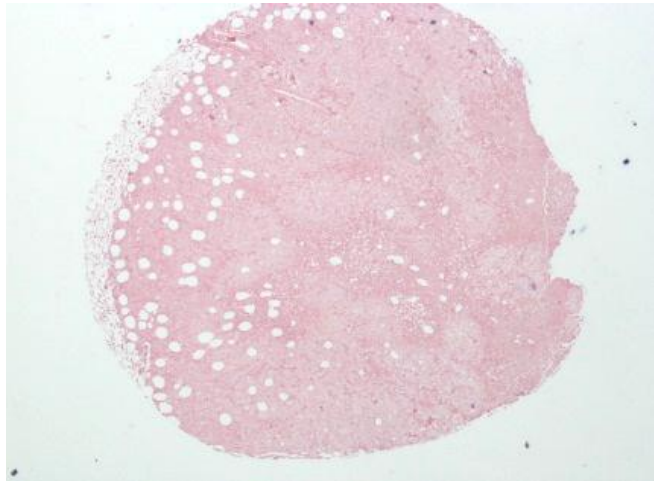

Negative control x10

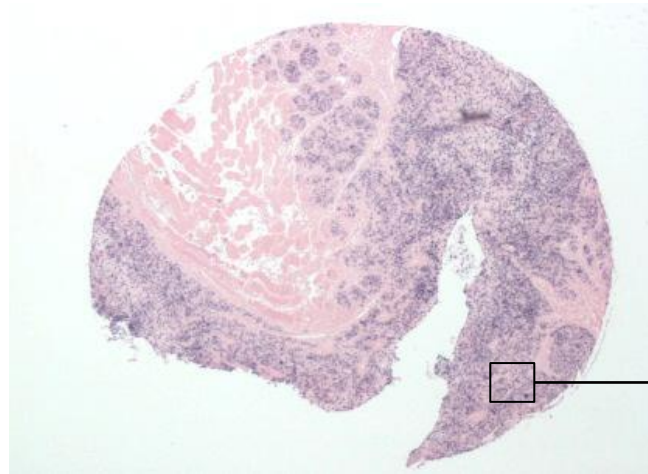

Positive control x10

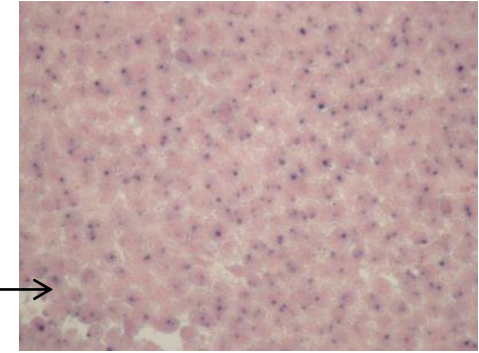

Positive control x40

B

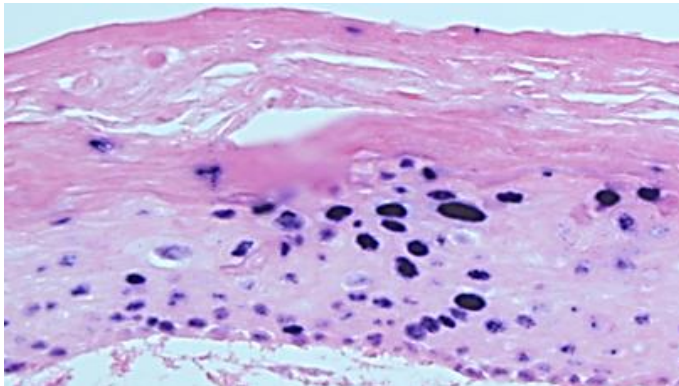

HPV 18 transfected keratinocyte raft tissue

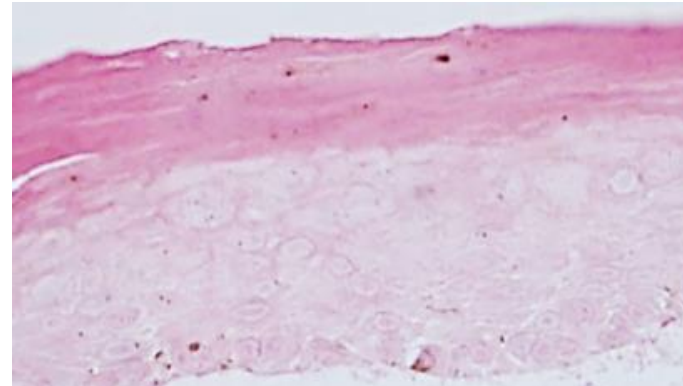

Untransfected keratinocyte raft tissue

**Supplemental Figure 1: Detection of high risk HPV in control tissue using Ventana ISH.**

**A:** HPV untransfected (left) and transfected (right) xenograft mouse control tissue provided by Ventana. The left and middle panel show the results from Ventana ISH staining x 10 magnification and the right panel shows a higher magnification of the HPV positive tissue indicated by a box.

**B:** Positive and negative control tissue showing the presence of high risk HPV in HPV 18 transfected keratinocyte raft tissue.

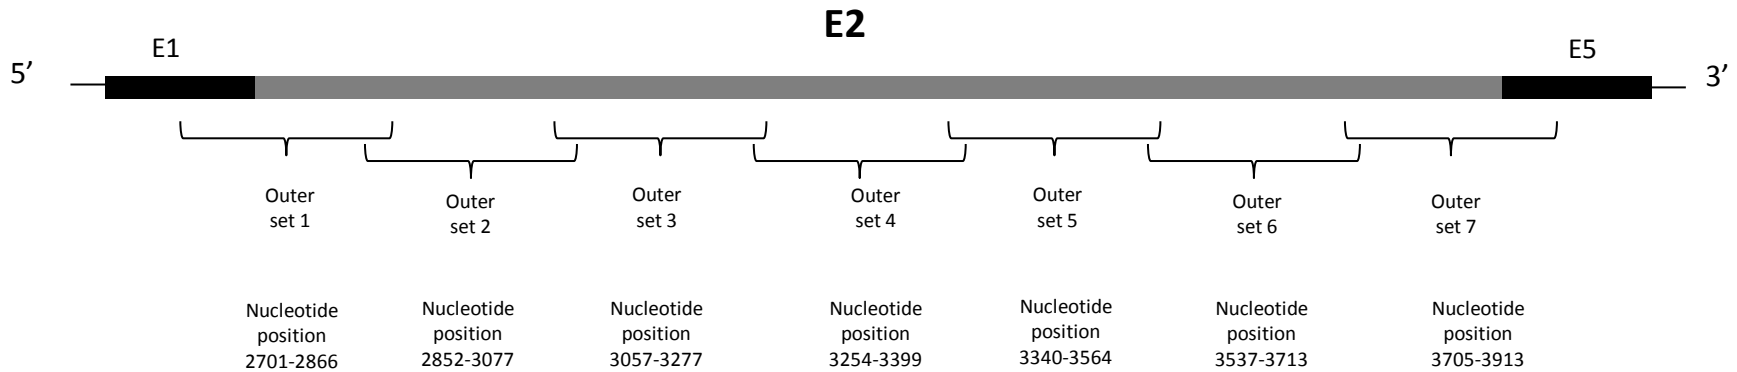

Supplemental Figure 2: Map showing the nucleotide location of where each of the overlapping primer sets are within the *E2* gene.

# Supplemental Table 1 – List of primers used

| Primers for nested E6 Q-PCR                        | PCR product size (bp) | Nucleotide positions |
|----------------------------------------------------|-----------------------|----------------------|
| HPV16 E6 long set FWD 5'-GAACAGCAATACAACAAACC -3'  |                       |                      |
| HPV16 E6 long set REV 5'-GATCTGCAACAAGACATACA -3'  | 164                   | 362-526              |
| HPV16 E6 nested FWD 5'-CAAACCGTTGTGTGATTTGTT -3'   |                       |                      |
| HPV16 E6 nested REV 5'-TGAAGAAAAGCAAAGACATCTGG -3' | 80                    | 381-461              |
| HPV16 E6 probe 5' - TGCAAAAAGCCACTGTGTC - 3'       |                       |                      |
| Primers for Nested E2 PCR                          |                       |                      |
| L - long outer primers                             |                       |                      |
| S - short inner primers                            |                       |                      |
| E2L1FWD 5'-AGGACGTGGTCCAGATTAAG -3'                |                       |                      |
| E2L1REV 5' -TCTAGGCGCATGTGTTTCCA -3'               | 165                   | 2701-2866            |
| E2S1FWD 5' - TTAAGTTTGACGAGGACGA -3'               |                       |                      |
| E2S1REV 5' -TTTAAACGTTGGCAAAGAGTCTCC -3'           | 60                    | 2716-2716            |
| E2L2FWD 5' -CACATGCGCCTAGAATGTGC -3'               | 225                   | 2852-3077            |
| E2L2REV 5' -ACATCCTGTTGGTGCAGTTA -3'               |                       |                      |
| E2S2FWD 5' -TGCCAACACTGGCTGTATCA -3'               | 59                    | 2925-2984            |
| E2S2REV 5' -AGTTGCAGTTCAATTGCTTGT -3'              |                       |                      |
| E2L3FWD 5' -TAACTGCACCAACAGGATGT -3'               | 220                   | 3057-3277            |
| E2L3REV 5' -TCTGCATCATCTTTAAACTGCACA -3'           |                       |                      |
| E2S3FWD 5' -CAATGCATTATACAAACTGGACACA -3'          | 81                    | 3132 -3213           |
| E2S3REV 5' CAACTTGACCCTTACCACAGT -3'               |                       |                      |
| E2L4FWD 5' -GTGCAGTTTAAAGATGATGCAGA -3'            |                       |                      |
| E2L4REV 5' -GCCAAGTGCTGCCTAATAAT -3'               | 145                   | 3254- 3399           |
| E2S4FWD 5' -ATCTGTGTTTAGCAGCAACG -3'               |                       |                      |
| E2S4Rev 5' -GCTGCCTAATAATTCAGGAGAGG -3'            | 52                    | 3340-3392            |
| E2L5FWD 5'-ATCTGTGTTTAGCAGCAACG -3'                |                       |                      |
| E2L5REV5'-TAAATGCAGTGAGGATTGGA -3'                 | 224                   | 3340-3564            |
| E2S5FWD 5' -CAGACGACTATCCAGCGACC -3'               |                       |                      |
| E2S5Rev 5' -AACTTAGTGGTGTGGCAGGG -3'               | 65                    | 3452-3517            |
| E2L6FWD 5'-ACAGTGCTCCAATCCTCACT -3'                |                       |                      |
| E2L6REV 5' - CCAATGCCATGTAGACGACAC -3'             | 176                   | 3537 -3713           |
| E2S6FWD 5' -TGCTCCAATCCTCACTGCAT -3'               |                       |                      |
| E2S6REV 5' -CCGTCCTTTGTGTGAGCTGT -3'               | 45                    | 3541-3586            |
| E2L7FWD 5'- GGCATTGGACAGGACATAAT -3'               |                       |                      |
| E2L7REV 5'-CAAAAGCACACAAAGCAAAG -3'                | 208                   | 3703-3913            |
| E2S7FWD 5' -GCATTGGACAGGACATAATGTAAA -3'           |                       |                      |
| E2S7REV 5' -TCACGTTGCCATTCATCATC -3'               | 75                    | 3707-3782            |

## Supplemental Table 2 – List of Samples tested

| Sample number | Group    | HPV nested PCR | Luminex  | P16 tested | E4 tested | E2 tested |
|---------------|----------|----------------|----------|------------|-----------|-----------|
| 43            | negative | INVALID        | INVALID  | tested     |           |           |
| 25            | negative | not done       | INVALID  | tested     |           |           |
| 78            | negative | not done       | INVALID  | tested     |           |           |
| 81            | negative | not done       | INVALID  | tested     |           |           |
| 72            | negative | negative       | INVALID  | tested     |           |           |
| 18            | negative | negative       | INVALID  | tested     |           |           |
| 31            | negative | negative       | INVALID  | tested     |           |           |
| 10            | negative | positive       | INVALID  | tested     |           |           |
| 91            | negative | not done       | not done | tested     |           |           |
| 102           | negative | not done       | not done | tested     |           |           |
| 105           | negative | not done       | not done | tested     |           |           |
| 93            | negative | not done       | not done | tested     |           |           |
| 107           | negative | not done       | not done | tested     |           |           |
| 95            | negative | not done       | not done | tested     |           |           |
| 106           | negative | not done       | not done | tested     |           |           |
| 92            | negative | not done       | not done | tested     |           |           |
| 99            | negative | not done       | not done | tested     |           |           |
| 103           | negative | not done       | not done | tested     |           |           |
| 41            | negative | negative       | not done | tested     |           |           |
| 59            | negative | negative       | not done | tested     |           |           |
| 97            | negative | negative       | not done | tested     |           |           |
| 38            | negative | INVALID        | negative | tested     |           |           |
| 42            | negative | INVALID        | negative | tested     |           |           |
| 58            | negative | INVALID        | negative | tested     |           |           |
| 13            | negative | not done       | negative | tested     |           |           |
| 29            | negative | not done       | negative | tested     |           |           |
| 3             | negative | not done       | negative | tested     |           |           |
| 1             | negative | not done       | negative | tested     |           |           |
| 14            | negative | not done       | negative | tested     |           |           |
| 67            | negative | not done       | negative | tested     |           |           |
| 50            | negative | not done       | negative | tested     |           |           |
| 11            | negative | not done       | negative | tested     |           |           |
| 30            | negative | not done       | negative | tested     |           |           |

## Continued from above

| Sample number | Group    | HPV nested PCR | Luminex  | P16 tested | E4 tested | E2 tested |
|---------------|----------|----------------|----------|------------|-----------|-----------|
| 85            | positive | positive       | negative | tested     | tested    | tested    |
| 84            | positive | positive       | negative | tested     |           | tested    |
| 75            | positive | positive       | negative | tested     | tested    | tested    |
| 66            | positive | positive       | negative | tested     | tested    | tested    |
| 61            | positive | positive       | negative | tested     |           | tested    |
| 54            | positive | positive       | negative | tested     | tested    | tested    |
| 52            | positive | positive       | negative | tested     |           | tested    |
| 28            | positive | positive       | negative | tested     | tested    | tested    |
| 8             | positive | positive       | negative | tested     |           | tested    |
| 65            | positive | negative       | negative | tested     |           |           |
| 51            | positive | negative       | negative | tested     |           |           |
| 100           | positive | positive       | not done | tested     |           | tested    |
| 80            | positive | positive       | INVALID  | tested     |           | tested    |
| 79            | positive | positive       | INVALID  | tested     |           | tested    |
| 73            | positive | positive       | INVALID  | tested     |           | tested    |
| 76            | positive | negative       | INVALID  | tested     |           |           |
| 2             | positive | negative       | INVALID  | tested     |           |           |
| 98            | positive | not done       | negative | tested     |           |           |
| 89            | positive | not done       | negative | tested     |           |           |
| 88            | positive | not done       | not done | tested     |           |           |
| 87            | positive | not done       | INVALID  | tested     |           |           |
| 68            | positive | not done       | negative | tested     |           |           |
| 44            | positive | not done       | negative | tested     |           |           |
| 39            | positive | not done       | negative | tested     |           |           |
| 35            | positive | not done       | not done | tested     |           |           |
| 34            | positive | not done       | negative | tested     |           |           |
| 21            | positive | not done       | negative | tested     |           |           |
| 96            | positive | INVALID        | not done | tested     |           |           |
| 70            | positive | INVALID        | negative | tested     |           |           |
| 63            | positive | INVALID        | positive | tested     |           |           |

## Continued from above

| Sample number | Group    | HPV nested PCR | Luminex  | P16 tested | E4 tested | E2 tested |
|---------------|----------|----------------|----------|------------|-----------|-----------|
| 17            | negative | not done       | negative | tested     |           |           |
| 62            | negative | negative       | negative | tested     |           |           |
| 40            | negative | negative       | negative | tested     |           |           |
| 45            | negative | negative       | negative | tested     |           |           |
| 19            | negative | negative       | negative | tested     |           |           |
| 64            | negative | negative       | negative | tested     |           |           |
| 60            | negative | negative       | negative | tested     |           |           |
| 12            | negative | negative       | negative | tested     |           |           |
| 27            | negative | negative       | negative | tested     |           |           |
| 9             | negative | negative       | negative | tested     |           |           |
| 48            | negative | negative       | negative | tested     |           |           |
| 90            | negative | negative       | negative | tested     |           |           |
| 7             | negative | negative       | negative | tested     |           |           |
| 6             | negative | negative       | negative | tested     |           |           |
| 47            | negative | positive       | negative | tested     |           |           |
| 46            | negative | positive       | negative | tested     |           |           |
| 32            | negative | positive       | negative | tested     |           |           |
| 22            | negative | positive       | negative | tested     |           |           |
| 83            | positive | positive       | positive | tested     | tested    | tested    |
| 82            | positive | positive       | positive | tested     | tested    | tested    |
| 77            | positive | positive       | positive | tested     | tested    | tested    |
| 33            | positive | positive       | positive | tested     | tested    | tested    |
| 15            | positive | positive       | positive | tested     | tested    | tested    |
| 74            | positive | negative       | positive | tested     |           |           |
| 26            | positive | negative       | positive | tested     |           |           |
